# Supplementary material
Source: Springer Nature journal article supplement (https://www.springermedizin.de/resource/supplementary/13012_2014_792_MOESM3_ESM.pdf/9630700)

C  
O  
N  
C  
E  
P  
T  
U  
A  
L

M  
E  
T  
H  
O  
D  
O  
L  
O  
G  
I  
C  
A  
L

P  
R  
A  
C  
T  
I  
C  
A  
L

RECOMMENDATIONS  
Conceptual: education on properties of PROMs  
Methodological: improve measurement and feedback

Subjective measurement  
PROMs V Satisfaction  
PROMs V clinical data

Focus/variability  
Timing  
Choice of measures  
Interpretation  
Trust

Time  
Support

ATTITUDES

IMPACT

No value

No impact

Sceptics

Undecided

No impact

Converts

Value

Impact

Advocates

RECOMMENDATIONS  
Practical: improve infrastructure for collection/dissemination and support for further audit/research  
Attitudes: consult with professionals  
Impact: clear objectives and priority from management

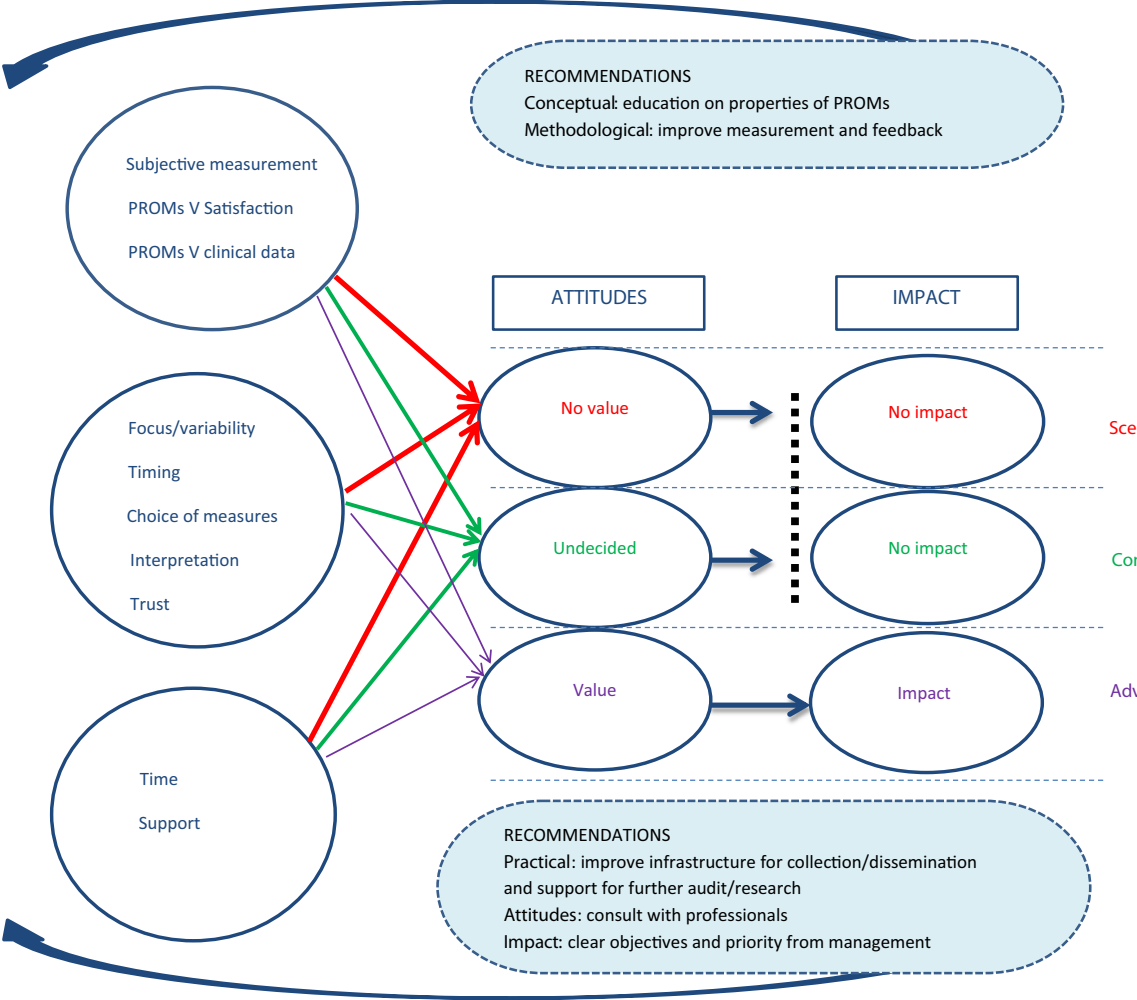

Supplement: MOESM3 [file 9630700]
